# Supplementary material for: Comparative Analysis of Hydrophilic Ingredients in Toad Skin and Toad Venom Using the UHPLC-HR-MS/MS and UPLC-QqQ-MS/MS Methods Together with the Anti-Inflammatory Evaluation of Indolealkylamines
Source: PubMed Central journal article supplement (PMC6337282; doi:10.3390/molecules24010086), 2018-12-27
Supplement: molecules-24-00086-s001.pdf [file molecules-24-00086-s001.pdf]

# Comparative Analysis of Hydrophilic Ingredients in Toad Skin and Toad Venom Using the UHPLC-HR-MS/MS and UPLC-QqQ-MS/MS Methods Together with the Anti-Inflammatory Evaluation of Indolealkylamines

Yu Zhang <sup>1</sup>, Bo Yuan <sup>2</sup>, Norio Takagi <sup>2</sup>, Hongjie Wang <sup>1</sup>, Yanyan Zhou <sup>1</sup>, Nan Si <sup>1</sup>, Jian Yang <sup>1</sup>, Xiaolu Wei <sup>1</sup>, Haiyu Zhao <sup>1,\*</sup> and Baolin Bian <sup>1,\*</sup>

<sup>1</sup> Institute of Chinese Materia Medica, China Academy of Chinese Medical Sciences, Beijing 100700, China; zhangyuddnh@163.com (Y.Z.); hjwang@icmm.ac.cn (H.W.); yyzhou@icmm.ac.cn (Y.Z.); nsi@icmm.ac.cn (N.S.); jyang@icmm.ac.cn (J.Y.); xlwei@icmm.ac.cn (X.W.)

<sup>2</sup> Department of Applied Biochemistry, Tokyo University of Pharmacy & Life Sciences, 1432-1 Horinouchi, Hachioji, Tokyo 192-0392, Japan; yuanbo@toyaku.ac.jp (B.Y.); takagino@toyaku.ac.jp (N.T.)

\* Correspondence: hyzhao@icmm.ac.cn (H.Z.); blbian@icmm.ac.cn (B.B.); Tel.: +136-610-784-32 (H.Z.); +139-012-278-22 (B.B.)

**Table S1.** Parameters of UPLC-QqQ-MS/MS analysis for eleven compounds

| Compounds                    | Rt<br>/min | MRM                                      |      |       |       |      |
|------------------------------|------------|------------------------------------------|------|-------|-------|------|
|                              |            | Q1/Q3 ion <sup>a</sup><br>( <i>m/z</i> ) | DP/V | CE/eV | CXP/V | EP/V |
| Valine                       | 1.08       | 118.0/72.1                               | 30   | 11    | 11    | 10   |
| Adenine                      | 1.39       | 136.1/119.2                              | 34   | 31    | 16    | 10   |
| Nicotinic acid               | 1.68       | 124.0/80.0                               | 102  | 31    | 13    | 10   |
| Hypoxanthine                 | 2.10       | 137.2/120.1                              | 100  | 32    | 7     | 10   |
| Xanthine                     | 2.68       | 153.0/136.2                              | 149  | 25    | 15    | 10   |
| Serotonin                    | 4.44       | 177.1/160.2                              | 92   | 14    | 10    | 10   |
| N-methyl serotonin           | 4.95       | 191.0/160.1                              | 45   | 15    | 11    | 10   |
| Bufotenidine                 | 5.35       | 219.2/160.1                              | 42   | 23    | 25    | 10   |
| Bufotenine                   | 5.72       | 205.1/160.1                              | 24   | 24    | 14    | 10   |
| Dehydrobufotenine            | 7.30       | 203.0/188.1                              | 102  | 31    | 17    | 10   |
| Bufothionine                 | 7.72       | 283.0/203.2                              | 130  | 21    | 16    | 10   |
| Diazepam                     | 8.72       | 284.9/193.1                              | 167  | 43    | 12    | 10   |
| Ion spray voltage (IS) /V    |            |                                          | 5500 |       |       |      |
| Ion source (GS1) setting/Psi |            |                                          | 55   |       |       |      |
| Ion source (GS2) setting/Psi |            |                                          | 55   |       |       |      |

<sup>a</sup>Q1: precursor ion selected in Q1; Q3: product ion selected in Q3;

**Table S2.** The regression equation, LOD and LOQ of the 11 standards in toad skin samples

| Analyte            | Regression equations                     | <i>R</i> | Linear range<br>( $\mu\text{g/mL}$ ) | LOD<br>( $\text{ng/mL}$ ) | LOQ<br>( $\text{ng/mL}$ ) | Repeatability<br>( $n=6$ ) | Stability<br>( $\text{RSD}\%$ ) | Intra-day<br>precision<br>( $\text{RSD}\%$ , $n=6$ ) | Inter-day<br>precision<br>( $\text{RSD}\%$ , $n=3$ ) |
|--------------------|------------------------------------------|----------|--------------------------------------|---------------------------|---------------------------|----------------------------|---------------------------------|------------------------------------------------------|------------------------------------------------------|
| Valine             | $Y=3.8355\times 10^6X+2.4571\times 10^6$ | 0.9997   | 0.21-43.48                           | 0.0095                    | 0.047                     | 2.69                       | 2.05                            | 2.15                                                 | 2.33                                                 |
| Adenine            | $Y=1.0274\times 10^7X+1080200$           | 0.9997   | 0.15-6.05                            | 0.33                      | 3.30                      | 0.71                       | 2.95                            | 1.15                                                 | 1.95                                                 |
| Nicotinic acid     | $Y=881906X+2016.4$                       | 0.9995   | 0.11-4.60                            | 2.30                      | 11.50                     | 2.37                       | 1.24                            | 1.50                                                 | 1.84                                                 |
| Hypoxanthine       | $Y=2.200\times 10^6X+3688.9$             | 0.9995   | 0.23-93.75                           | 2.34                      | 11.72                     | 2.93                       | 2.69                            | 2.09                                                 | 2.39                                                 |
| Xanthine           | $Y=4400200X+2335.1$                      | 0.9994   | 0.42-42.25                           | 0.99                      | 4.95                      | 3.21                       | 3.35                            | 2.64                                                 | 3.05                                                 |
| Serotonin          | $Y=1.1181\times 10^6X+1.5718\times 10^6$ | 0.9988   | 2.38-38.20                           | 24.76                     | 49.52                     | 1.37                       | 2.24                            | 0.25                                                 | 3.38                                                 |
| N-methyl serotonin | $Y=1.97615\times 10^7X+713317$           | 0.9999   | 3.00-48.00                           | 7.74                      | 38.71                     | 2.44                       | 3.31                            | 1.59                                                 | 3.01                                                 |
| Bufotenidine       | $Y=6.5895\times 10^7X+387000$            | 0.9995   | 23.37-374.00                         | 1.30                      | 6.50                      | 1.36                       | 2.34                            | 2.26                                                 | 2.76                                                 |
| Bufotenine         | $Y=4.1411\times 10^6X+1395.8$            | 0.9989   | 12.93-414.00                         | 25.88                     | 103.52                    | 2.90                       | 3.46                            | 1.30                                                 | 3.19                                                 |

|                   |                                               |        |             |        |       |      |      |      |      |
|-------------------|-----------------------------------------------|--------|-------------|--------|-------|------|------|------|------|
| Dehydrobufotenine | $Y=3.2817 \times 10^8 X + 154440$             | 0.9991 | 3.00-48.00  | 0.0069 | 0.069 | 2.56 | 3.38 | 1.26 | 1.68 |
| Bufothionine      | $Y=4.3126 \times 10^7 X + 1.1772 \times 10^5$ | 0.9995 | 3.07-153.75 | 0.77   | 3.84  | 2.08 | 2.29 | 0.66 | 1.49 |

**Table S3.** The regression equation, LOD and LOQ of the eleven standards in toad venom samples

| Analyte             | Regression equations                          | <i>R</i> | Linear range<br>( $\mu\text{g/mL}$ ) | LOD<br>( $\text{ng/mL}$ ) | LOQ<br>( $\text{ng/mL}$ ) | Repeatability<br>( $n=6$ ) | Stability<br>( $\text{RSD}\%$ ) | Intra-day<br>precision<br>( $\text{RSD}\%$ , $n=6$ ) | Inter-day<br>precision<br>( $\text{RSD}\%$ , $n=3$ ) |
|---------------------|-----------------------------------------------|----------|--------------------------------------|---------------------------|---------------------------|----------------------------|---------------------------------|------------------------------------------------------|------------------------------------------------------|
| Valine              | $Y=5.3156 \times 10^6 X + 1.1318 \times 10^6$ | 0.9997   | 0.043-1.08                           | 0.0095                    | 0.047                     | 1.04                       | 2.85                            | 2.15                                                 | 2.33                                                 |
| Adenine             | $Y=1.0274 \times 10^7 X + 1080200$            | 0.9997   | 0.15-6.05                            | 0.33                      | 3.30                      | 1.87                       | 3.31                            | 1.15                                                 | 1.95                                                 |
| Nicotinic acid      | $Y=5.1613 \times 10^6 X + 8.2313 \times 10^4$ | 0.9995   | 0.023-1.15                           | 2.30                      | 11.50                     | 2.69                       | 2.72                            | 1.50                                                 | 1.84                                                 |
| Hypoxanthine        | $Y=818537X + 167954$                          | 0.9985   | 0.023-3.75                           | 2.34                      | 11.72                     | 2.20                       | 2.49                            | 2.09                                                 | 2.39                                                 |
| Xanthine            | $Y=4129000X + 3264.3$                         | 0.9999   | 0.016-8.45                           | 0.99                      | 4.95                      | 2.34                       | 1.62                            | 2.64                                                 | 3.05                                                 |
| Serotonin           | $Y=1.3172 \times 10^6 X + 2.6083 \times 10^5$ | 0.9999   | 0.11-4.77                            | 24.76                     | 49.52                     | 1.32                       | 2.72                            | 0.25                                                 | 3.38                                                 |
| N -methyl serotonin | $Y=1.9476 \times 10^7 X + 13650$              | 0.9999   | 30.00-1920.00                        | 7.74                      | 38.71                     | 1.98                       | 2.00                            | 1.59                                                 | 3.01                                                 |
| Bufotenidine        | $Y=6.5895 \times 10^7 X + 387000$             | 0.9995   | 233.70-3740.00                       | 1.30                      | 6.50                      | 2.10                       | 1.25                            | 2.26                                                 | 2.76                                                 |
| Bufotenine          | $Y=4.1411 \times 10^6 X + 1395.8$             | 0.9989   | 129.37-1035.00                       | 25.88                     | 103.52                    | 2.93                       | 2.45                            | 1.30                                                 | 3.19                                                 |

|                   |                                               |        |              |        |       |      |      |      |      |
|-------------------|-----------------------------------------------|--------|--------------|--------|-------|------|------|------|------|
| Dehydrobufotenine | $Y=4.7837 \times 10^6 X - 12281$              | 0.9995 | 60.00-480.00 | 0.0069 | 0.069 | 2.34 | 2.87 | 1.26 | 1.68 |
| Bufothionine      | $Y=3.3481 \times 10^7 X + 1.0016 \times 10^6$ | 0.9998 | 0.03-3.07    | 0.77   | 3.84  | 0.36 | 2.77 | 0.66 | 1.49 |

**Table S4.** Recovery of eleven compounds in toad skin ( $n=3$ )

| Analyte             | Initial amount<br>( $\mu\text{g}$ ) | Added amount<br>( $\mu\text{g}$ ) | Total recovered<br>amount( $\mu\text{g}$ ) | Recovery<br>(%)       | RSD<br>(%) |
|---------------------|-------------------------------------|-----------------------------------|--------------------------------------------|-----------------------|------------|
| Valine              | 19.9426                             | 15.9859                           | 36.1297                                    | 101.2583 $\pm$ 3.0115 | 2.97       |
|                     | 19.9028                             | 19.9824                           | 40.2451                                    | 101.8012 $\pm$ 0.5798 | 0.56       |
|                     | 19.9824                             | 23.9789                           | 43.5476                                    | 98.2748 $\pm$ 2.1667  | 2.20       |
| Adenine             | 1.2409                              | 0.9969                            | 2.2281                                     | 99.0232 $\pm$ 1.2490  | 1.26       |
|                     | 1.2384                              | 1.2461                            | 2.4996                                     | 101.2111 $\pm$ 2.7558 | 2.72       |
|                     | 1.2434                              | 1.4953                            | 2.7646                                     | 101.7285 $\pm$ 2.0047 | 1.97       |
| Nicotinic acid      | 3.1768                              | 2.5219                            | 5.7724                                     | 102.9229 $\pm$ 1.6638 | 1.61       |
|                     | 3.1704                              | 3.1524                            | 6.3636                                     | 101.2923 $\pm$ 1.9745 | 1.94       |
|                     | 3.1831                              | 3.7829                            | 6.8594                                     | 97.1825 $\pm$ 1.0219  | 1.05       |
| Hypoxanthine        | 17.3134                             | 13.9372                           | 30.9724                                    | 99.3258 $\pm$ 1.7687  | 1.78       |
|                     | 17.2788                             | 17.4215                           | 34.8688                                    | 96.6490 $\pm$ 0.6166  | 0.63       |
|                     | 17.3479                             | 20.9058                           | 38.2977                                    | 102.3880 $\pm$ 2.0592 | 2.01       |
| Xanthine            | 12.2107                             | 9.7004                            | 21.8125                                    | 103.0415 $\pm$ 0.3191 | 0.31       |
|                     | 12.1863                             | 12.1255                           | 24.3112                                    | 103.2720 $\pm$ 1.2903 | 1.24       |
|                     | 12.2350                             | 14.5506                           | 26.7197                                    | 101.7960 $\pm$ 1.1414 | 1.12       |
| Serotonin           | 12.4092                             | 9.8867                            | 22.3880                                    | 100.9306 $\pm$ 2.6421 | 2.61       |
|                     | 12.3845                             | 12.3584                           | 25.0499                                    | 102.4840 $\pm$ 1.3794 | 1.34       |
|                     | 12.4340                             | 14.8301                           | 27.4797                                    | 101.4540 $\pm$ 3.1334 | 3.08       |
| N -methyl serotonin | 10.2749                             | 8.3142                            | 18.3882                                    | 97.5843 $\pm$ 1.4335  | 1.46       |
|                     | 10.2544                             | 10.3927                           | 20.9582                                    | 102.9942 $\pm$ 0.3299 | 0.29       |
|                     | 10.2953                             | 12.4712                           | 23.0443                                    | 102.2271 $\pm$ 0.4390 | 0.42       |
| Bufotenidine        | 102.2819                            | 81.0846                           | 186.4367                                   | 103.7865 $\pm$ 0.8486 | 0.82       |

|                   |          |          |          |                 |      |
|-------------------|----------|----------|----------|-----------------|------|
|                   | 102.0779 | 101.3557 | 202.7663 | 99.3417±1.2894  | 1.29 |
|                   | 102.4859 | 121.6268 | 226.1888 | 101.7068±0.8010 | 0.78 |
| Bufotenine        | 47.5919  | 38.4235  | 87.7697  | 104.5655±0.3481 | 0.33 |
|                   | 47.4970  | 48.0294  | 95.6302  | 100.2161±0.7315 | 0.73 |
|                   | 47.6869  | 57.6353  | 104.3142 | 98.2512±1.3342  | 1.35 |
| Dehydrobufotenine | 22.6642  | 16.5515  | 38.9057  | 98.1267±2.0924  | 2.13 |
|                   | 22.6190  | 20.6894  | 43.3865  | 100.3772±1.7402 | 1.73 |
|                   | 22.7094  | 24.8273  | 48.4912  | 103.8443±1.5376 | 1.48 |
| Bufothionine      | 54.3128  | 44.0750  | 99.4469  | 102.4029±2.6966 | 2.63 |
|                   | 54.2044  | 55.0938  | 107.1919 | 96.1876±0.0893  | 0.09 |
|                   | 54.4211  | 66.1126  | 118.4191 | 96.8016±0.6902  | 0.71 |

---



**Table S5.** Recovery of eleven compounds in toad venom (*n*=3)

| Analyte             | Initial amount<br>( $\mu\text{g}$ ) | Added amount<br>( $\mu\text{g}$ ) | Total recovered<br>amount( $\mu\text{g}$ ) | Recovery<br>(%)        | RSD<br>(%) |
|---------------------|-------------------------------------|-----------------------------------|--------------------------------------------|------------------------|------------|
| Valine              | 0.2507                              | 0.2010                            | 0.4457                                     | 97.0180 $\pm$ 1.6119   | 1.66       |
|                     | 0.2467                              | 0.2513                            | 0.5000                                     | 100.7959 $\pm$ 2.8695  | 2.84       |
|                     | 0.2508                              | 0.3016                            | 0.5499                                     | 99.1732 $\pm$ 3.0881   | 3.11       |
| Adenine             | 4.0673                              | 3.3012                            | 7.3935                                     | 100.7571 $\pm$ 2.5815  | 2.56       |
|                     | 4.0131                              | 4.1265                            | 8.2363                                     | 102.3448 $\pm$ 1.7186  | 1.67       |
|                     | 4.0809                              | 4.9518                            | 9.1164                                     | 101.6906 $\pm$ 2.2498  | 2.21       |
| Nicotinic acid      | 0.2212                              | 0.1751                            | 0.3905                                     | 96.7029 $\pm$ 1.2627   | 1.30       |
|                     | 0.2182                              | 0.2189                            | 0.4314                                     | 97.3785 $\pm$ 1.0159   | 1.04       |
|                     | 0.2219                              | 0.2627                            | 0.4735                                     | 95.8006 $\pm$ 1.2395   | 1.29       |
| Hypoxanthine        | 0.2212                              | 0.1751                            | 0.3905                                     | 99.9552 $\pm$ 3.3.2176 | 3.21       |
|                     | 0.2182                              | 0.2189                            | 0.4314                                     | 101.7055 $\pm$ 0.9623  | 0.94       |
|                     | 0.2219                              | 0.2627                            | 0.4735                                     | 102.5305 $\pm$ 2.9664  | 2.89       |
| Xanthine            | 1.7115                              | 1.3219                            | 3.0640                                     | 98.5530 $\pm$ 2.8588   | 2.90       |
|                     | 1.6887                              | 1.6524                            | 3.3693                                     | 99.4378 $\pm$ 2.2129   | 2.22       |
|                     | 1.7172                              | 1.9829                            | 3.7503                                     | 97.1840 $\pm$ 2.0844   | 2.14       |
| Serotonin           | 0.8173                              | 0.6283                            | 1.4461                                     | 100.0699 $\pm$ 1.7300  | 1.72       |
|                     | 0.8064                              | 0.7854                            | 1.5732                                     | 97.6347 $\pm$ 2.1333   | 2.18       |
|                     | 0.8200                              | 0.9425                            | 1.7311                                     | 96.6671 $\pm$ 2.3877   | 2.47       |
| N -methyl serotonin | 141.5192                            | 111.3772                          | 252.0478                                   | 99.2381 $\pm$ 0.8129   | 0.82       |
|                     | 139.6323                            | 139.2215                          | 282.2270                                   | 102.4229 $\pm$ 1.0194  | 0.99       |
|                     | 141.9910                            | 167.0658                          | 308.9295                                   | 99.9238 $\pm$ 2.2751   | 2.27       |
| Bufotenidine        | 1292.2692                           | 1030.5726                         | 2330.4032                                  | 100.7337 $\pm$ 3.0255  | 3.00       |

|                   |           |           |           |                 |      |
|-------------------|-----------|-----------|-----------|-----------------|------|
|                   | 1275.0390 | 1288.2158 | 2553.2371 | 99.2224±1.3035  | 1.31 |
|                   | 1296.5768 | 1545.859  | 2848.4041 | 100.3861±1.0842 | 1.08 |
| Bufotenine        | 495.9808  | 384.7958  | 881.5789  | 100.2085±1.0827 | 1.08 |
|                   | 489.3677  | 480.9947  | 968.6293  | 99.6397±2.9791  | 2.98 |
|                   | 497.6340  | 577.1936  | 1064.7046 | 98.2462±1.1273  | 1.14 |
| Dehydrobufotenine | 237.5481  | 184.3548  | 425.5484  | 101.9774±1.2692 | 1.24 |
|                   | 234.3808  | 230.4435  | 466.2928  | 100.6373±1.5951 | 1.58 |
|                   | 238.3399  | 276.5322  | 513.0391  | 99.3372±0.7294  | 0.73 |
| Bufothionine      | 1.9904    | 1.5723    | 3.5007    | 96.0586±2.4862  | 2.58 |
|                   | 1.9638    | 1.9654    | 3.9211    | 99.5872±2.7544  | 2.76 |
|                   | 1.9970    | 2.3585    | 4.3017    | 97.7189±1.2760  | 1.30 |

---

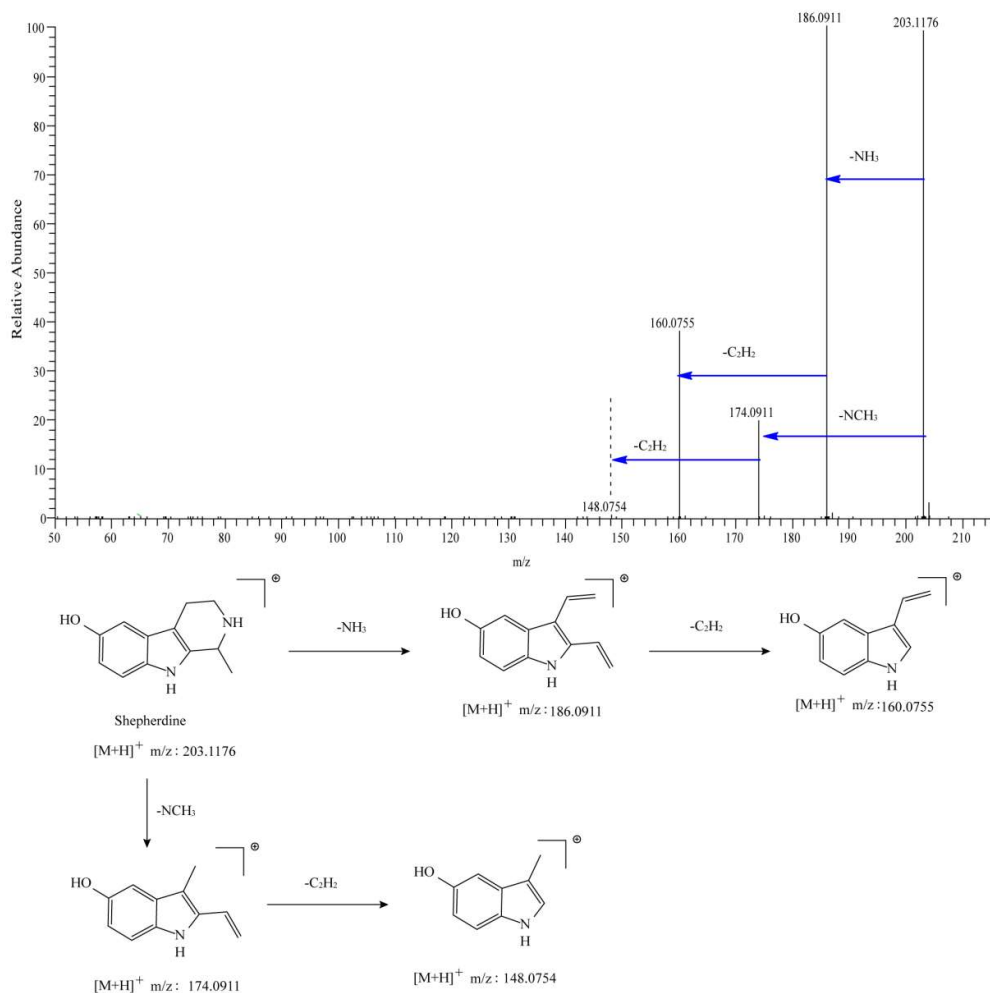

**Figure S1.** The MS/MS spectrum and fragmentation patterns of shepherdine

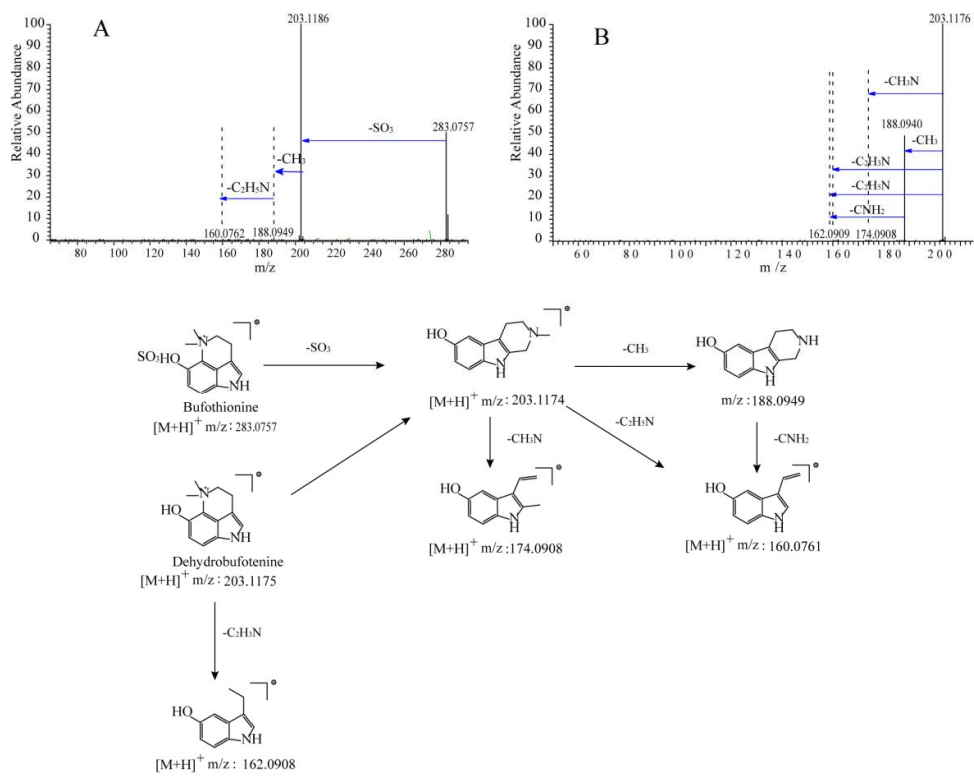

**Figure S2.** The MS/MS spectrum and fragmentation patterns of A: bufothionine; B: dehydrobufotenin

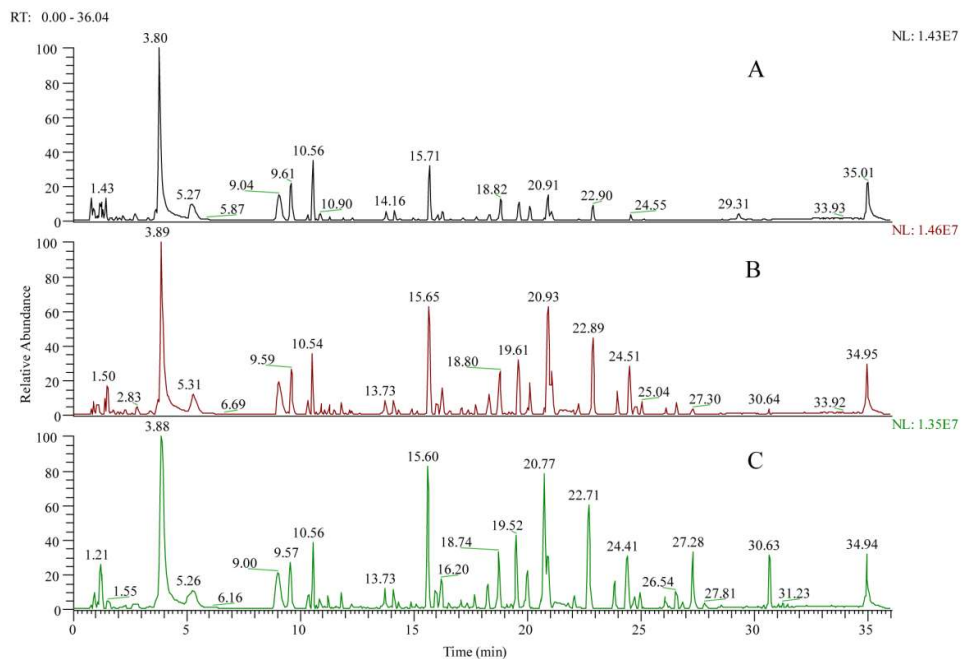

**Figure S3.** Optimized extraction conditions selected from three extraction solvents. A: water; B: 50% methanol; C: 50% ethanol.

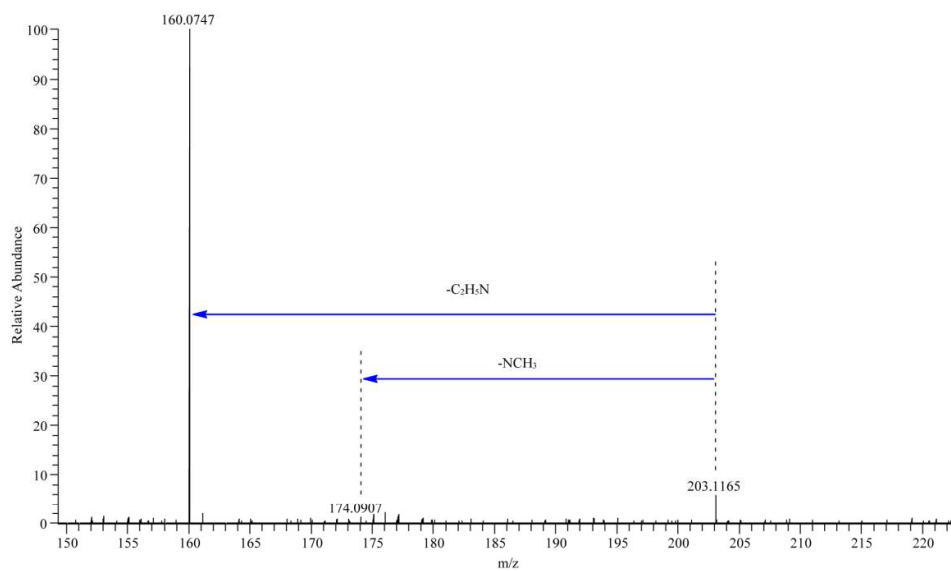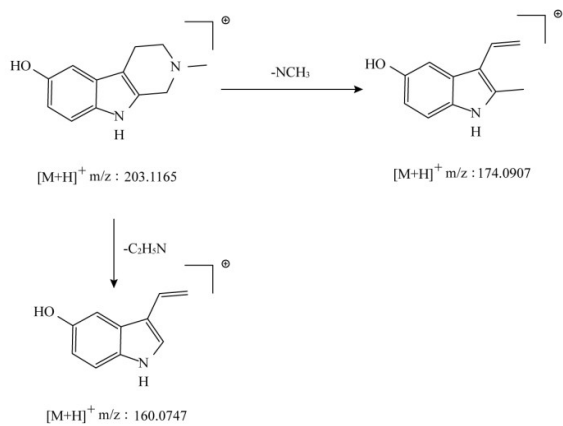

**Figure S4.** The MS/MS spectrum and fragmentation patterns of peak 19

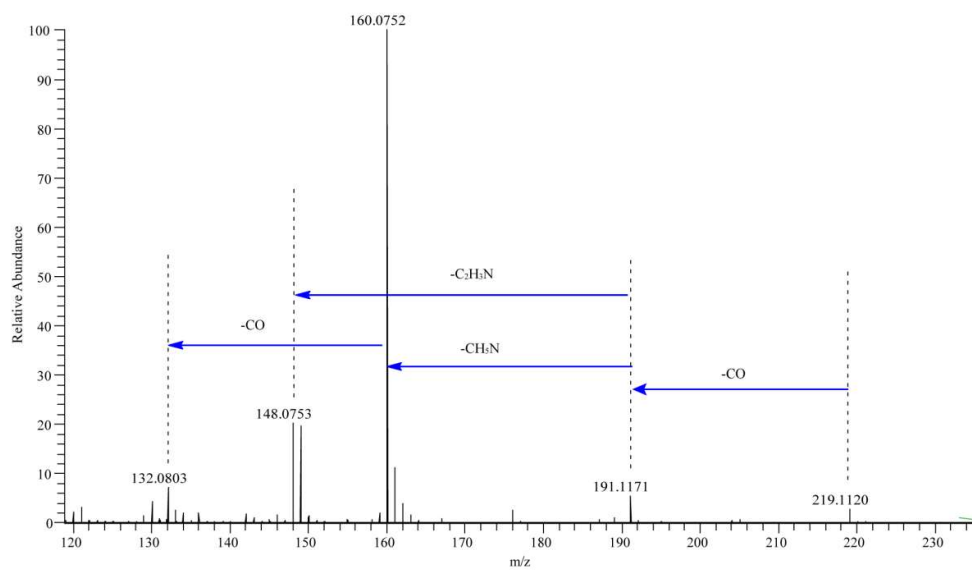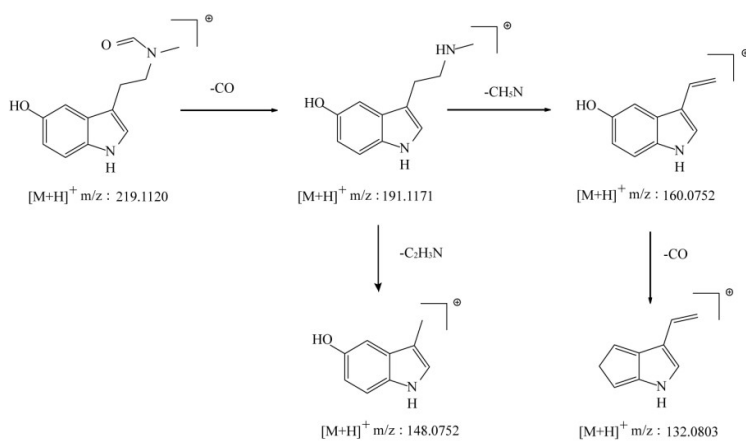

**Figure S5.** The MS/MS spectrum and fragmentation patterns of peak 20

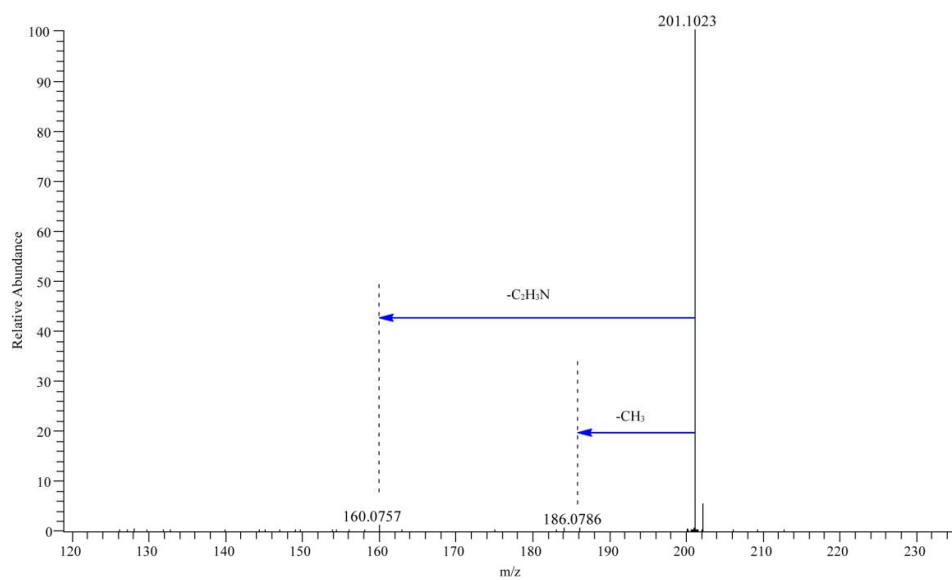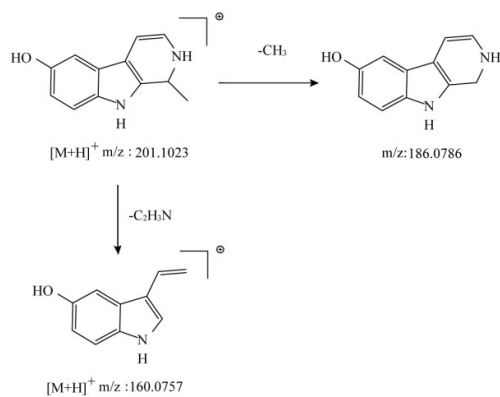

**Figure S6** The MS/MS spectrum and fragmentation patterns of peak **31**
